# Supplementary material for: Do Patients with Prostate Cancer Benefit from Exercise Interventions? A Systematic Review and Meta-Analysis
Source: MDPI journal article supplement (doi:10.3390/ijerph19020972), 2022-01-15
Supplement: s1 [file s1]

## Online resource 4 Additional analyses to primary outcomes

### Cancer-specific Quality of Life

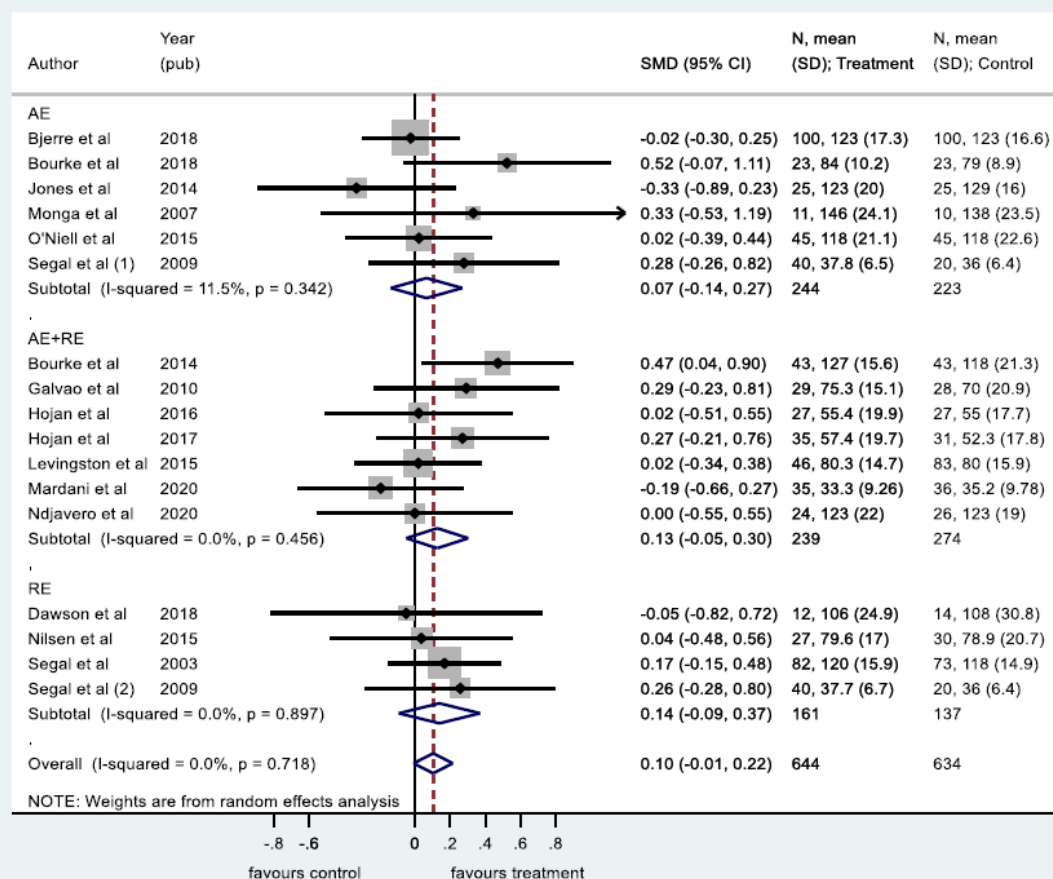

**Figure S1.** Pooled standard mean difference (SMD) on Cancer-specific quality of life comparing exercise interventions with usual care or control in men with prostate cancer stratified after exercise modality. A random effects model of DerSimonian & Laird, with estimate of heterogeneity from the Mantel-Haenszel model was used. AE: aerobic exercise, RE: resistance exercise.

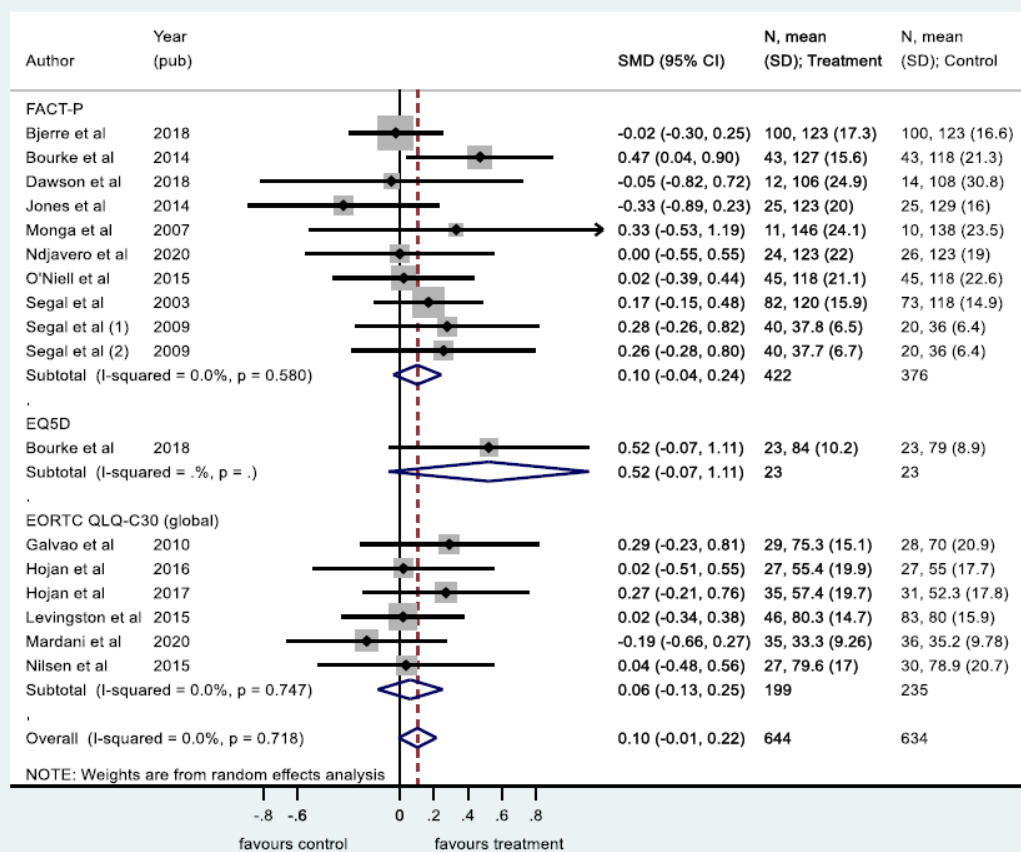

**Figure S2.** Pooled standard mean difference (SMD) on Cancer-specific quality of life comparing exercise interventions with usual care or control in men with prostate cancer stratified after assessment instrument. A random effects model of DerSimonian & Laird, with estimate of heterogeneity from the Mantel-Haenszel model was used.

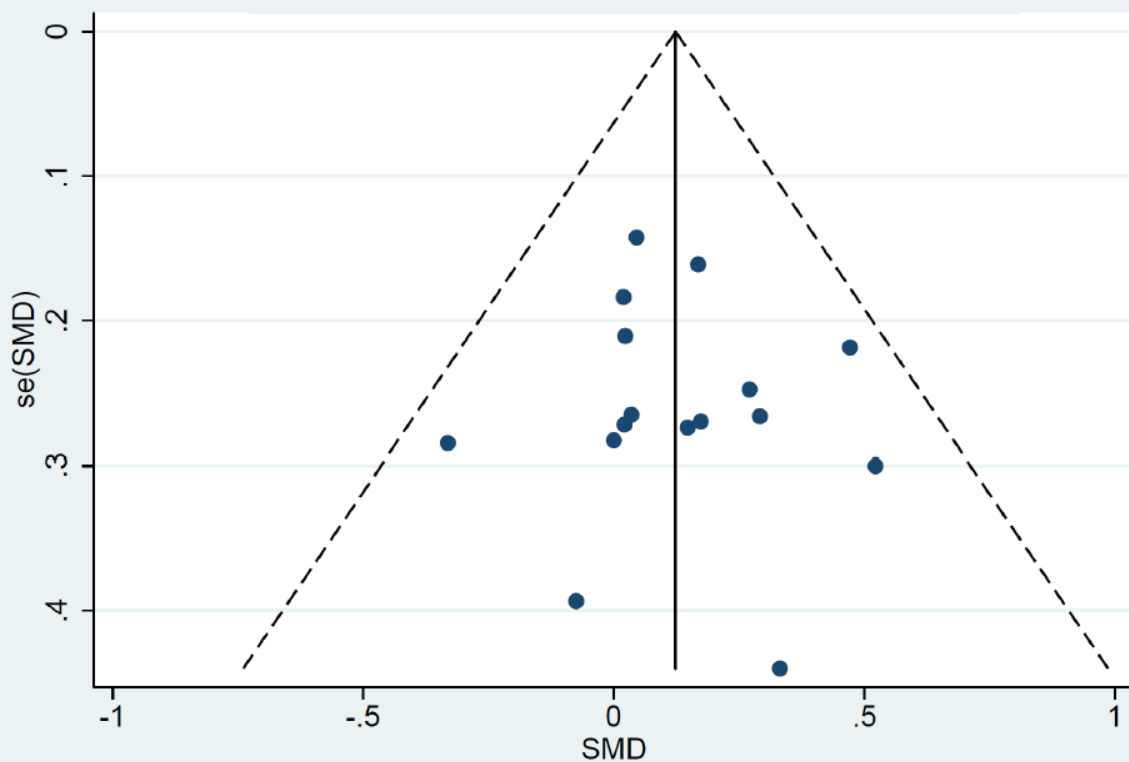

**Figure S3.** Funnel plot with pseudo 95% confidence limit on Cancer-specific quality of life in men with prostate cancer. Egger's test showed no small-study effects ( $P=0.729$ ).

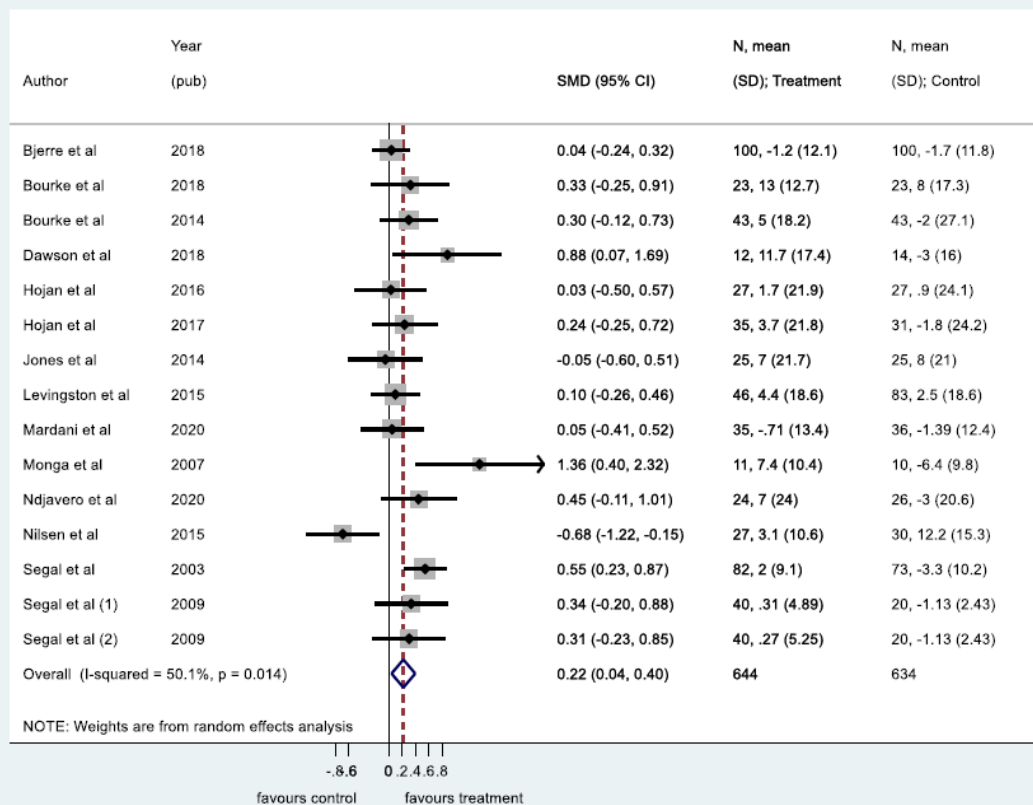

**Figure S4.** Pooled standard mean difference (SMD) for change score values on Cancer-specific quality of life comparing exercise interventions with usual care or control in men with prostate cancer. A random effects model of DerSimonian & Laird, with estimate of heterogeneity from the Mantel-Haenszel model was used.

### Cardiovascular fitness

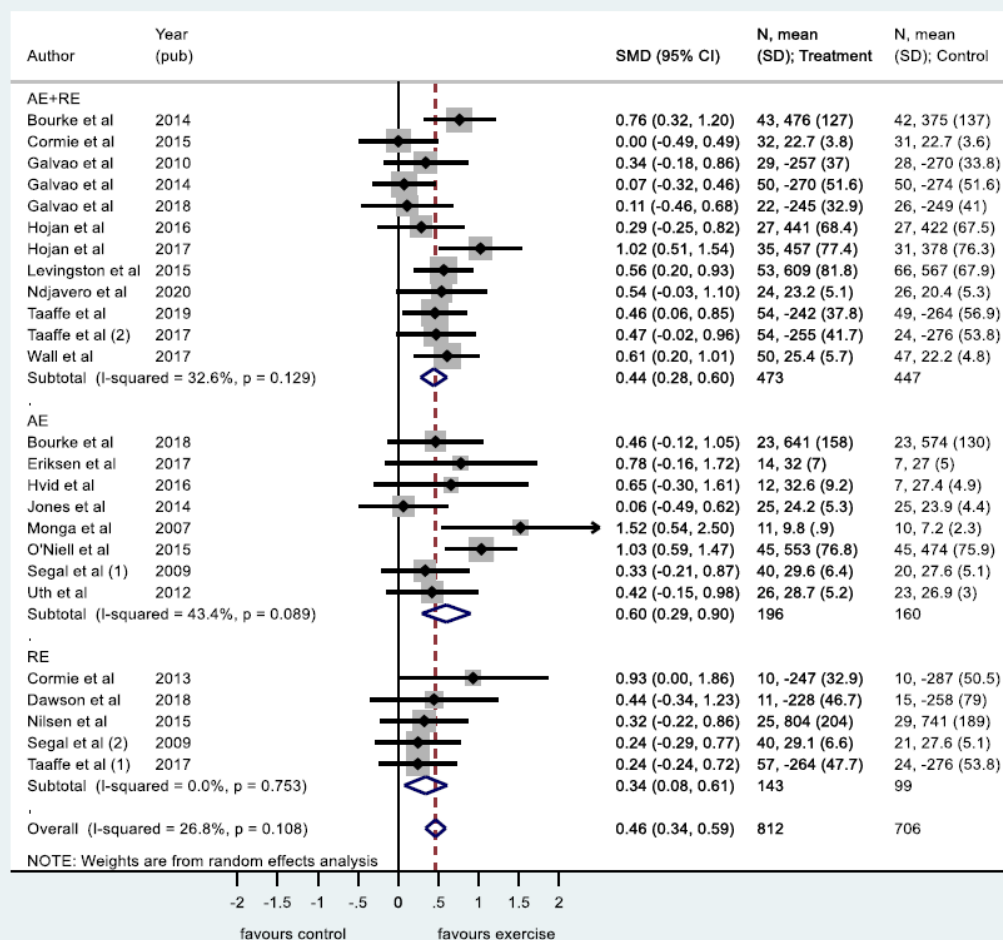

**Figure S5.** Pooled standard mean difference (SMD) on Cardiovascular fitness comparing exercise interventions with usual care or control in men with prostate cancer stratified after exercise modality. A random effects model of DerSimonian & Laird, with estimate of heterogeneity from the Mantel-Haenszel model was used.

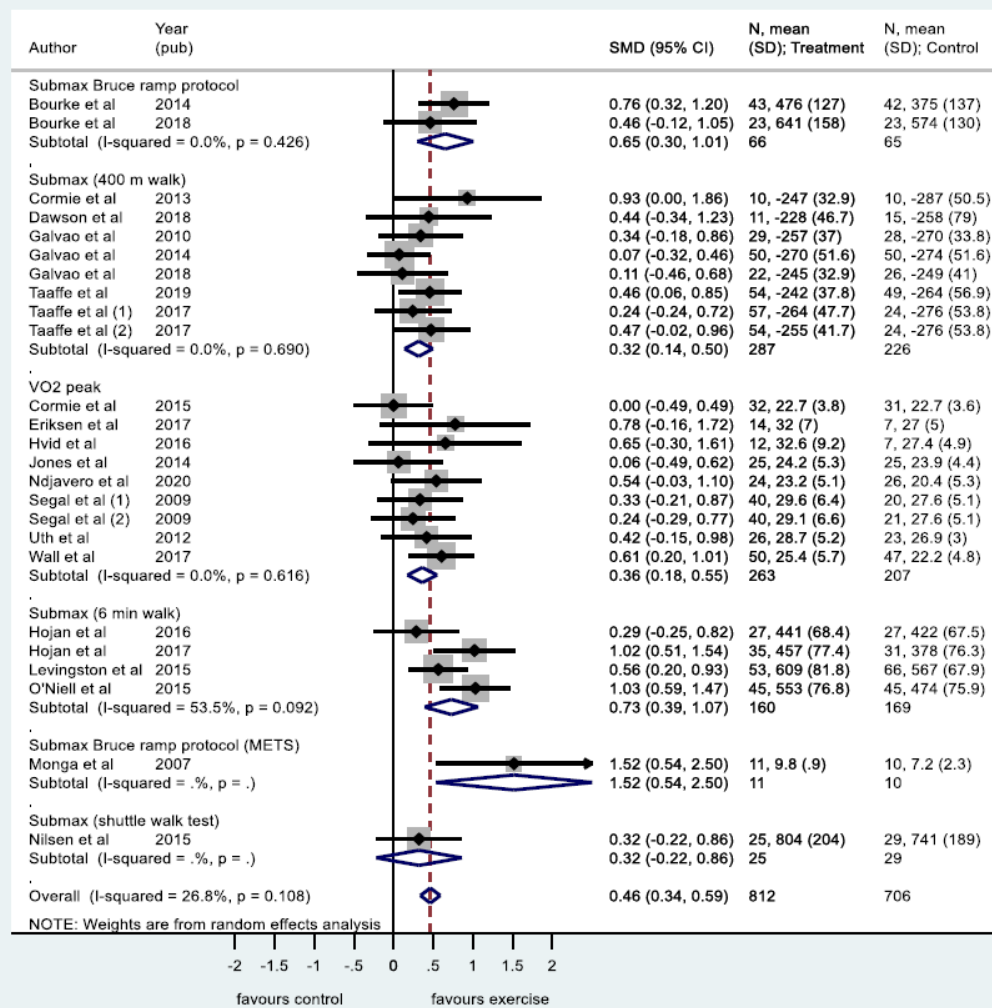

**Figure S6.** Pooled standard mean difference (SMD) on Cardiovascular fitness comparing exercise interventions with usual care or control in men with prostate cancer stratified after assessment instrument. A random effects model of DerSimonian & Laird, with estimate of heterogeneity from the Mantel-Haenszel model was used.

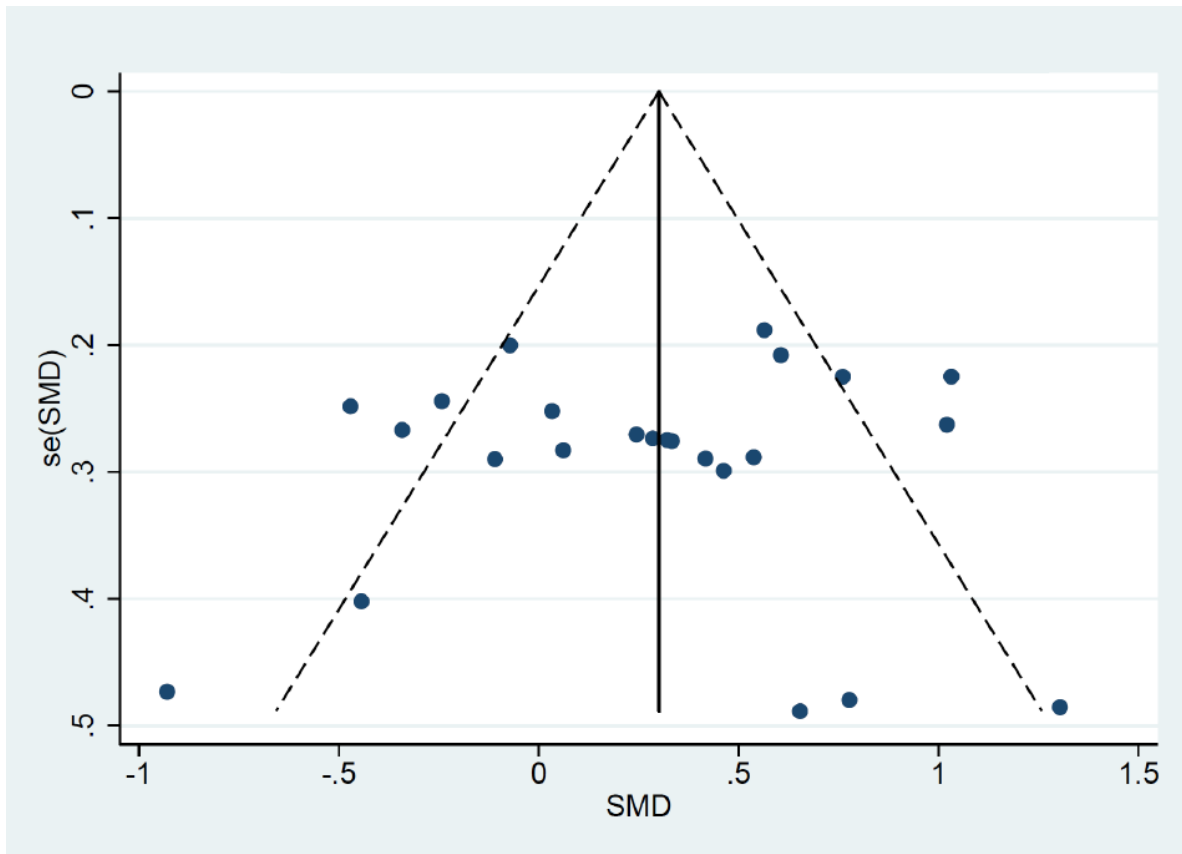

**Figure S7.** Funnel plot with pseudo 95% confidence limit on Cardiovascular function in men with prostate cancer. Egger's test showed no small-study effects ( $P=0.647$ )

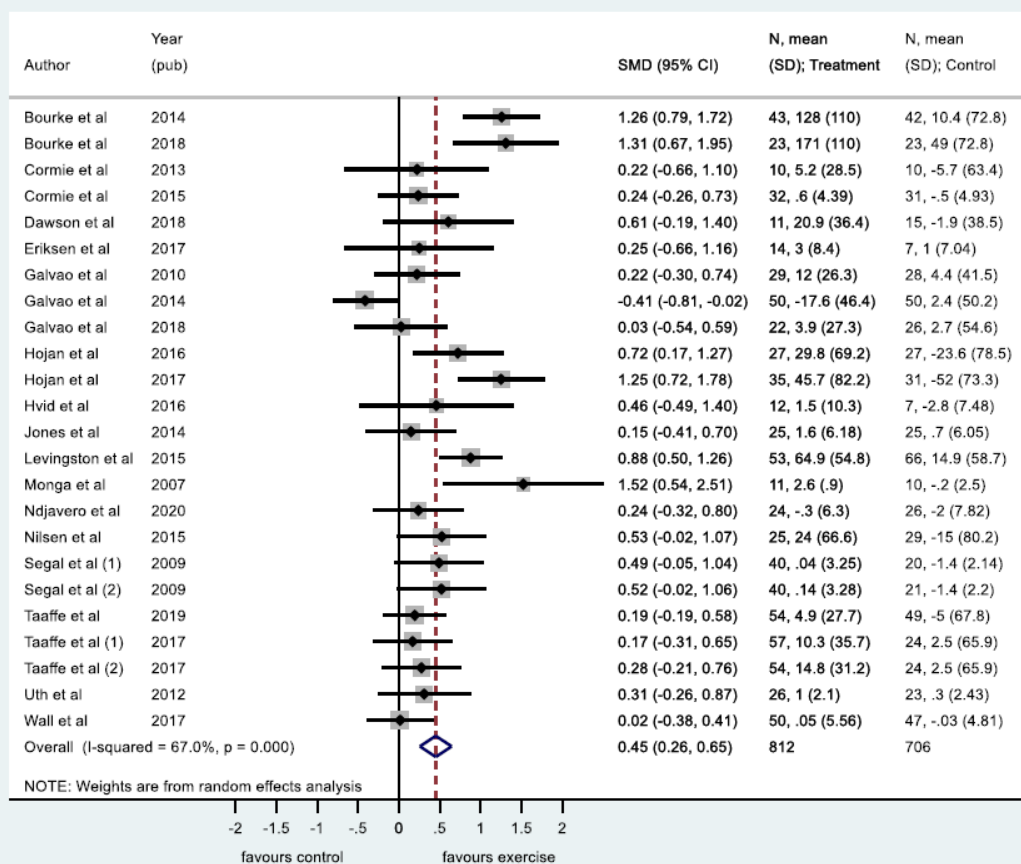

**Figure S8.** Pooled standard mean difference (SMD) for change score values on Cardiovascular fitness comparing exercise interventions with usual care or control in men with prostate cancer. A random effects model of DerSimonian & Laird, with estimate of heterogeneity from the Mantel-Haenszel model was used.
