# Supplementary material for: Do Patients with Prostate Cancer Benefit from Exercise Interventions? A Systematic Review and Meta-Analysis
Source: MDPI journal article supplement (doi:10.3390/ijerph19020972), 2022-01-15
Supplement: s1 [file s1]

## Fatigue

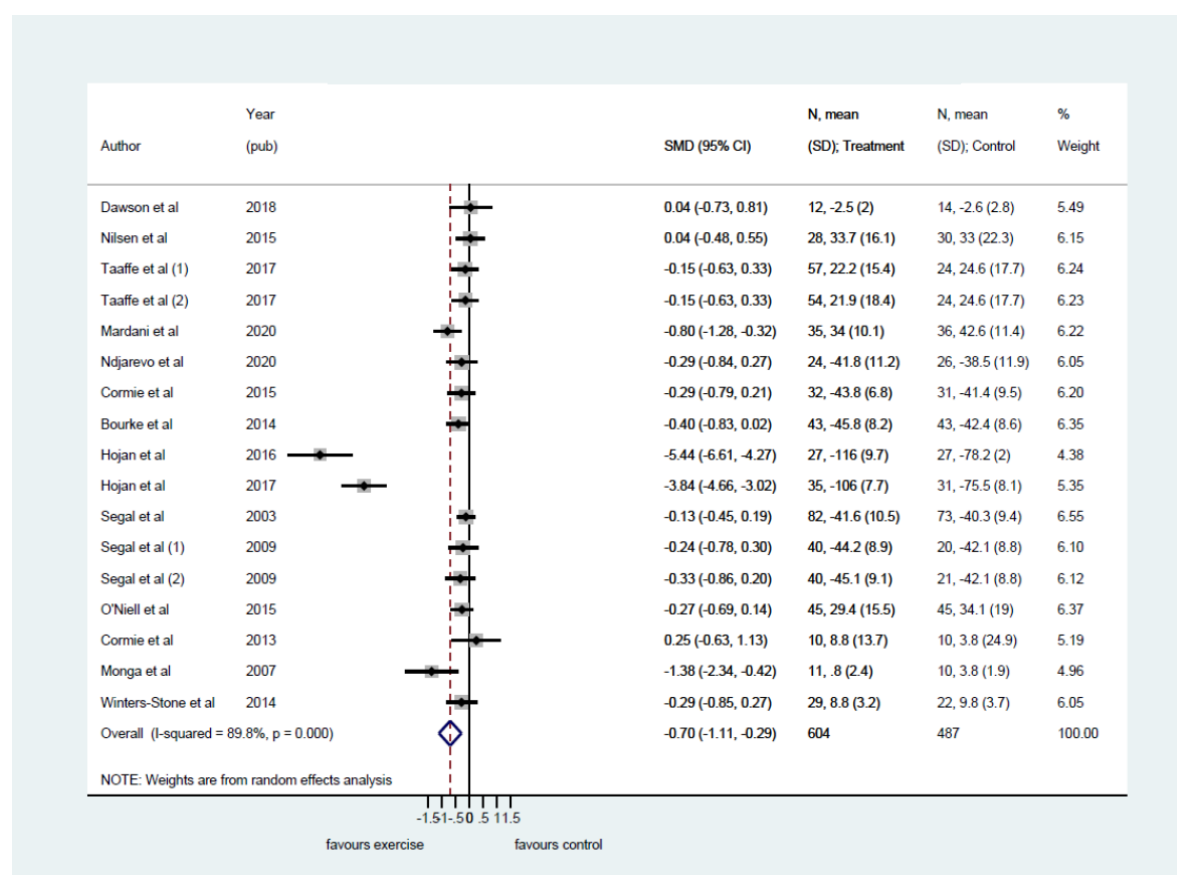

**Figure S9.** Pooled standard mean difference (SMD) on Fatigue comparing exercise interventions with usual care or control in men with prostate cancer. A random effects model of DerSimonian & Laird, with estimate of heterogeneity from the Mantel-Haenszel model was used.

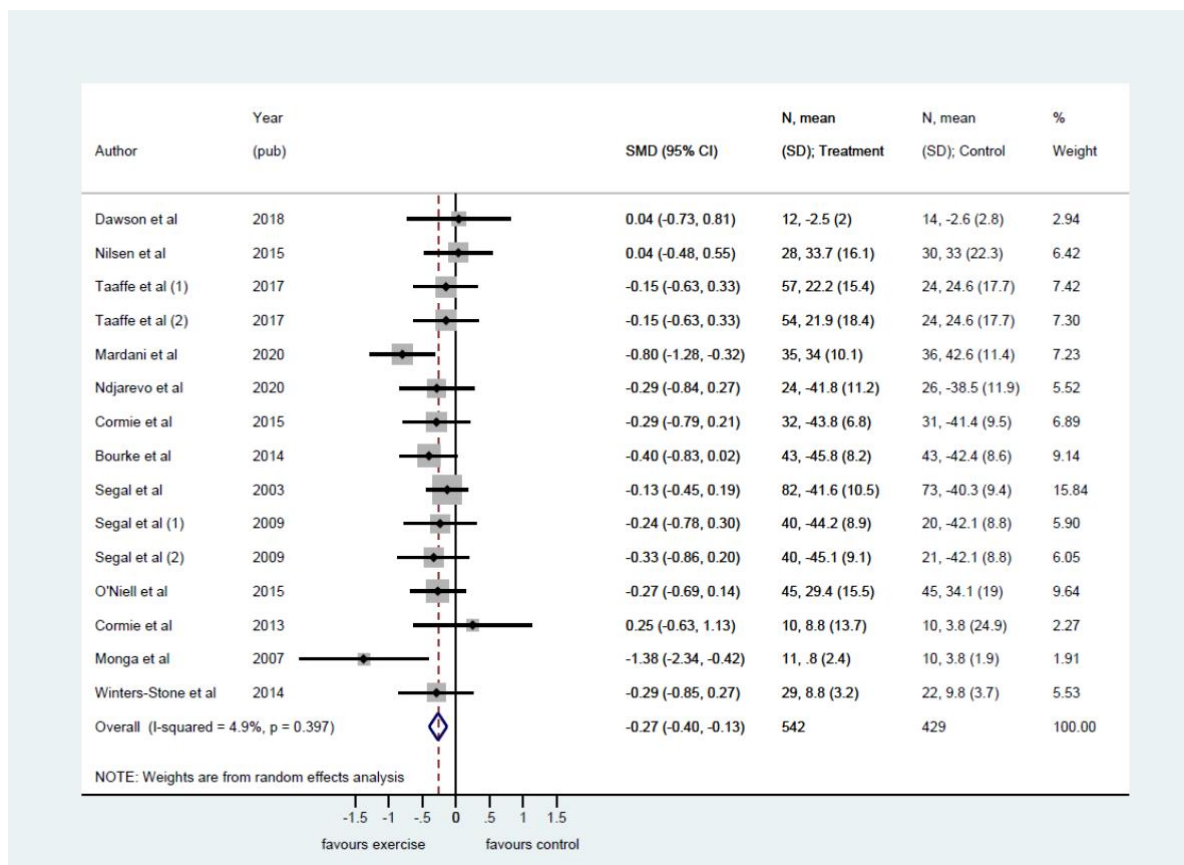

**Figure S10.** Pooled standard mean difference (SMD) on Fatigue comparing exercise interventions with usual care or control in men with prostate cancer. A random effects model of DerSimonian & Laird, with estimate of heterogeneity from the Mantel-Haenszel model was used. NOTE: Hojan et al. 2016 and 2017 was excluded from this meta-analysis.

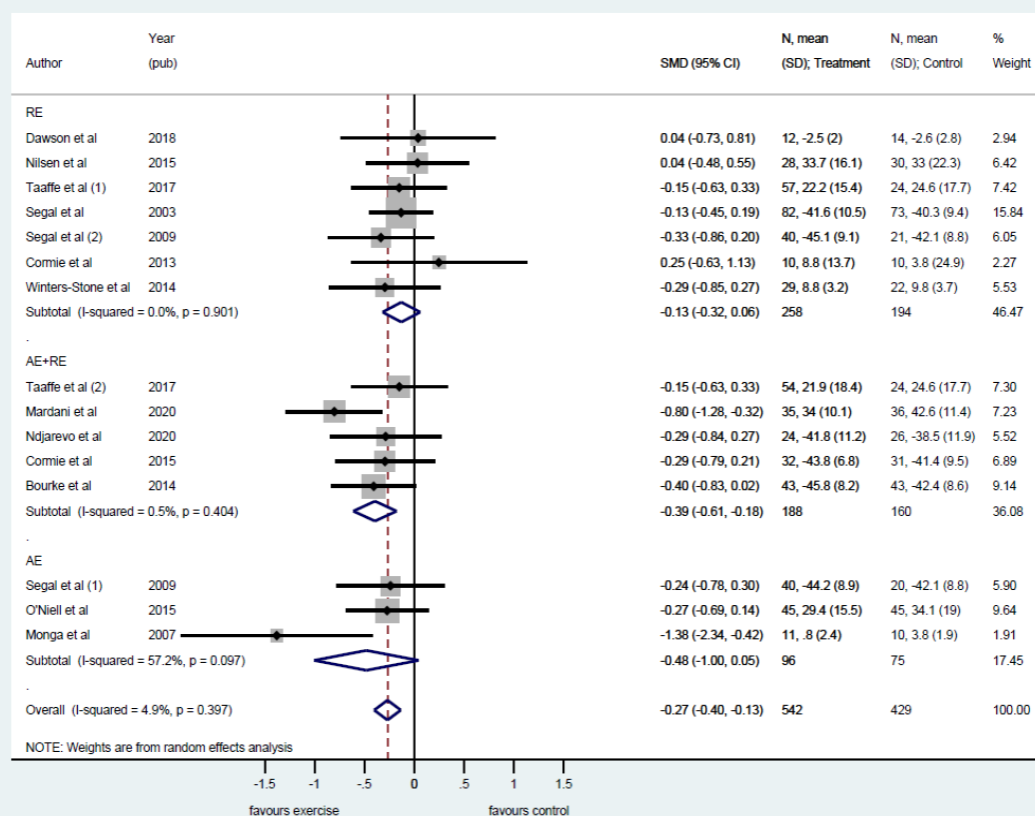

**Figure S11.** Pooled standard mean difference (SMD) on Fatigue comparing exercise interventions with usual care or control in men with prostate cancer stratified after exercise modality. A random effects model of DerSimonian & Laird, with estimate of heterogeneity from the Mantel-Haenszel model was used. NOTE: Hojan et al. 2016 and 2017 was excluded from this meta-analysis.

### Lower body strength

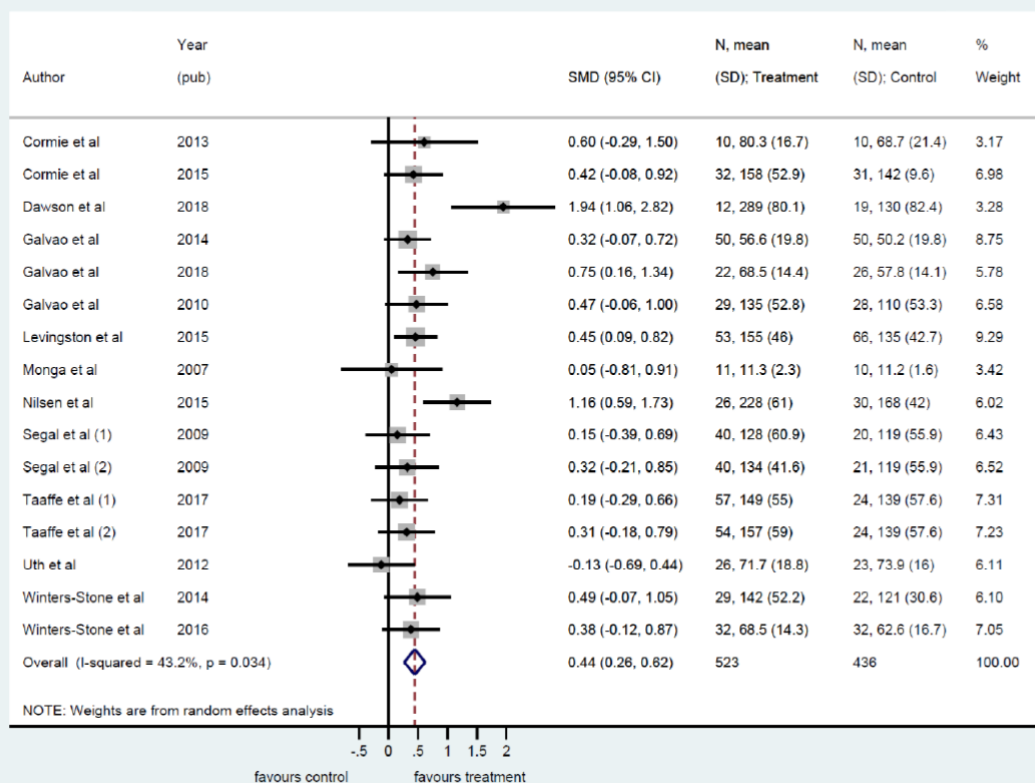

**Figure S12.** Pooled standard mean difference (SMD) on Lower body strength comparing exercise interventions with usual care or control in men with prostate cancer. A random effects model of DerSimonian & Laird, with estimate of heterogeneity from the Mantel-Haenszel model was used.

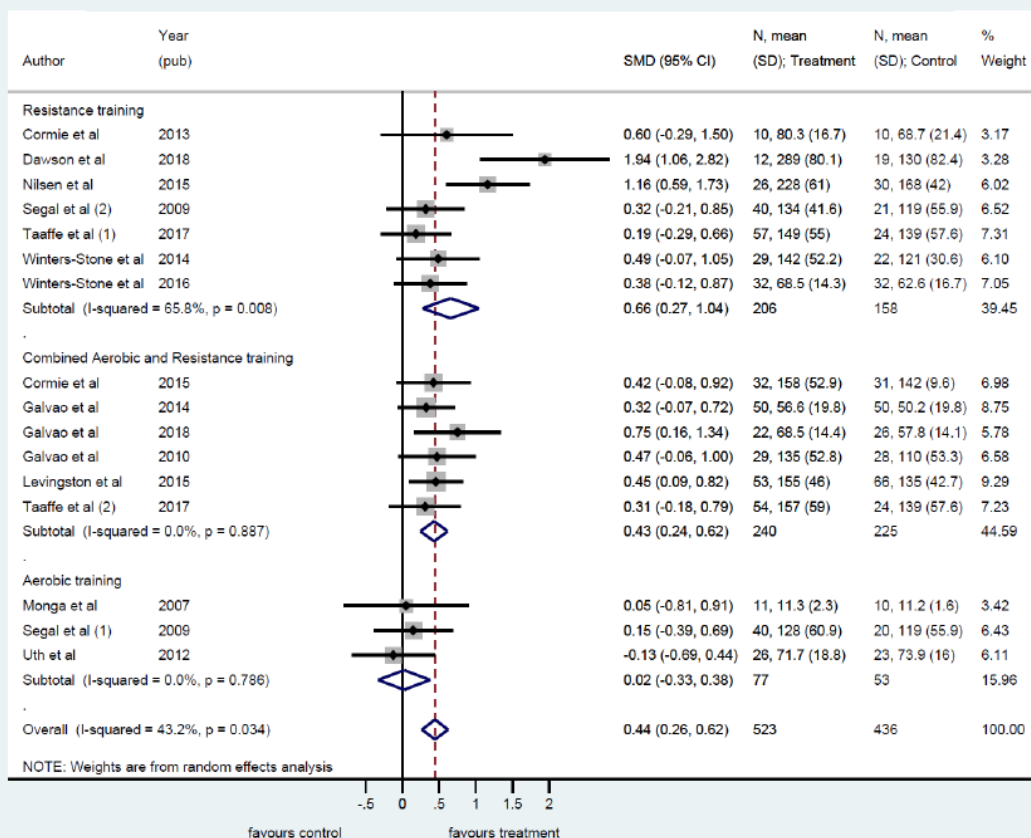

**Figure S13.** Pooled standard mean difference (SMD) on Lower body strength comparing exercise interventions with usual care or control in men with prostate cancer stratified after exercise modality. A random effects model of DerSimonian & Laird, with estimate of heterogeneity from the Mantel-Haenszel model was used.

## Lean body mass

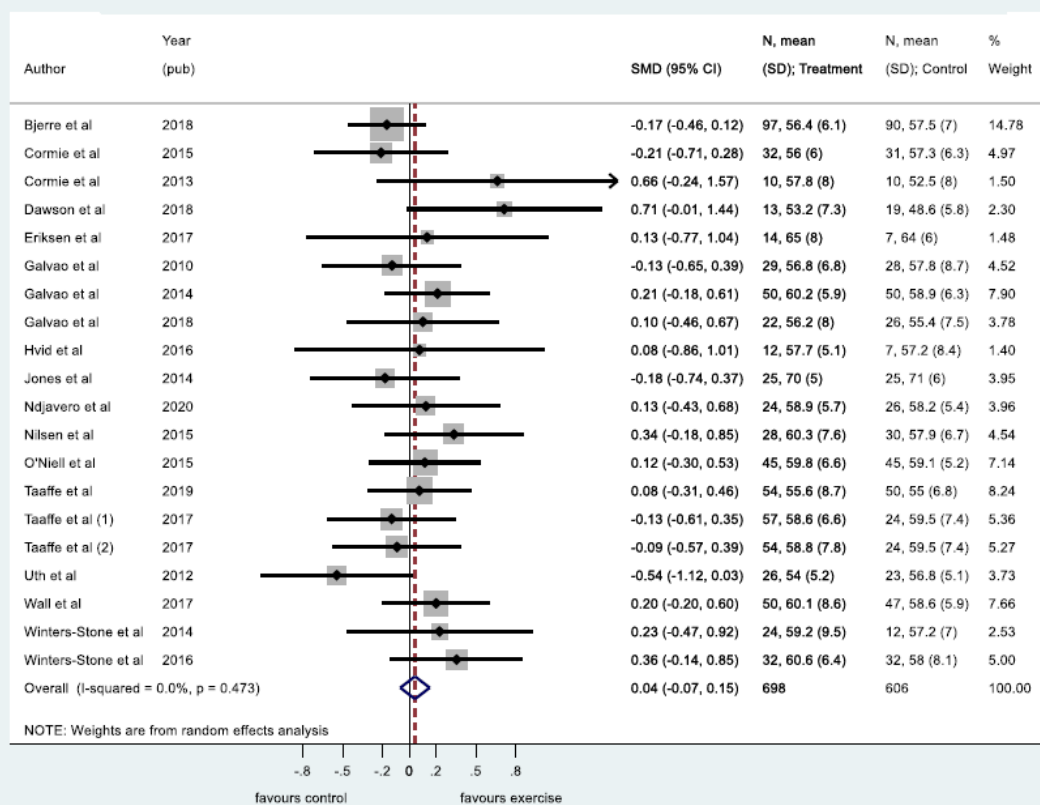

**Figure S14.** Pooled standard mean difference (SMD) on Lean body mass comparing exercise interventions with usual care or control in men with prostate cancer. A random effects model of DerSimonian & Laird, with estimate of heterogeneity from the Mantel-Haenszel model was used.

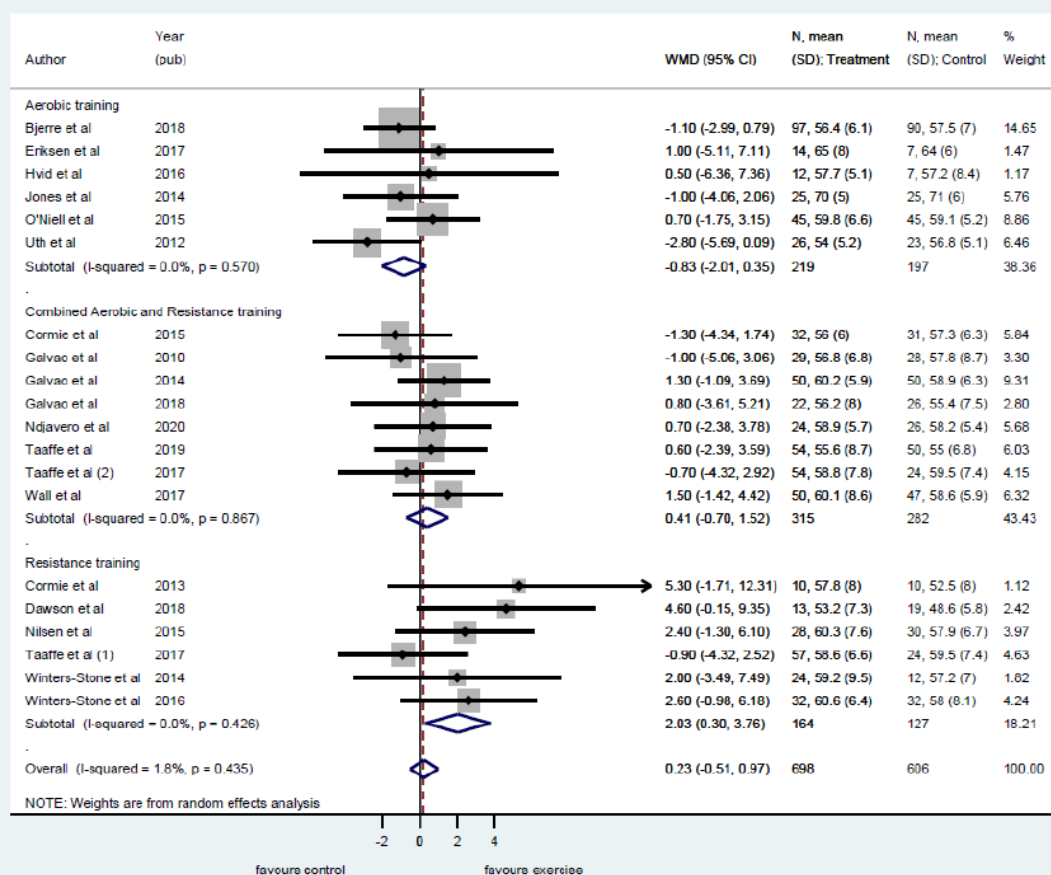

**Figure S15.** Pooled standard mean difference (SMD) on Lean body mass comparing exercise interventions with usual care or control in men with prostate cancer stratified after exercise modality. A random effects model of DerSimonian & Laird, with estimate of heterogeneity from the Mantel-Haenszel model was used.

## Whole body fat

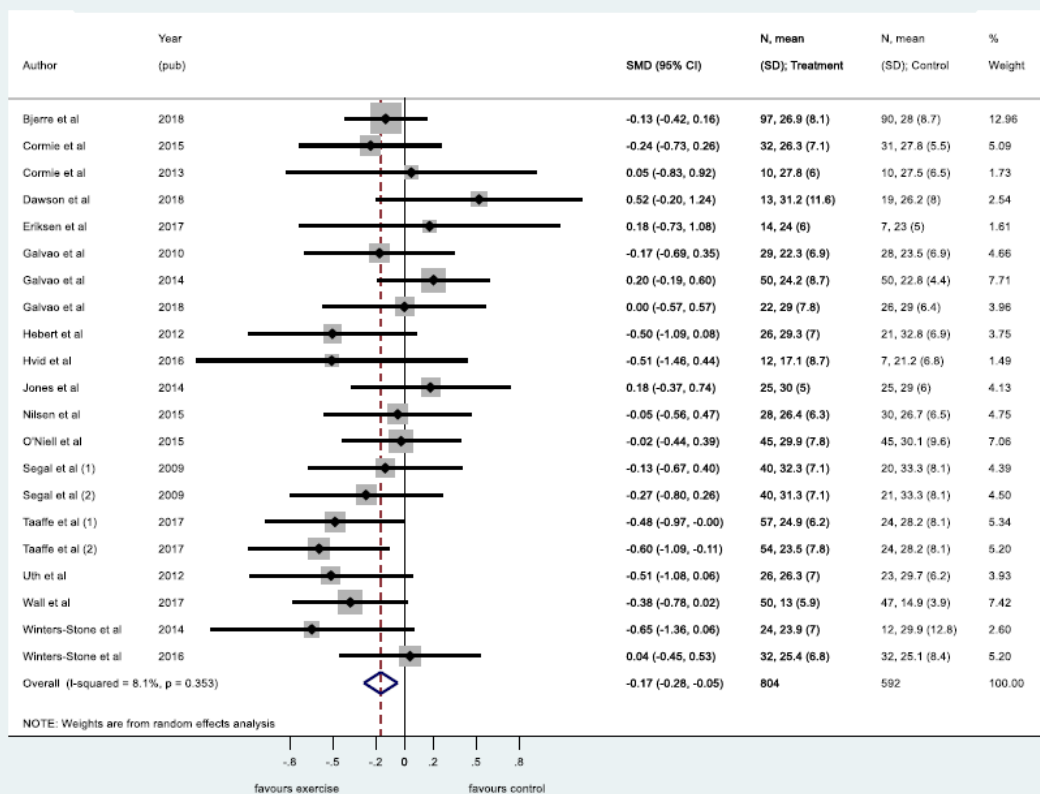

**Figure S16.** Pooled standard mean difference (SMD) on Whole body fat comparing exercise interventions with usual care or control in men with prostate cancer. A random effects model of DerSimonian & Laird, with estimate of heterogeneity from the Mantel-Haenszel model was used.



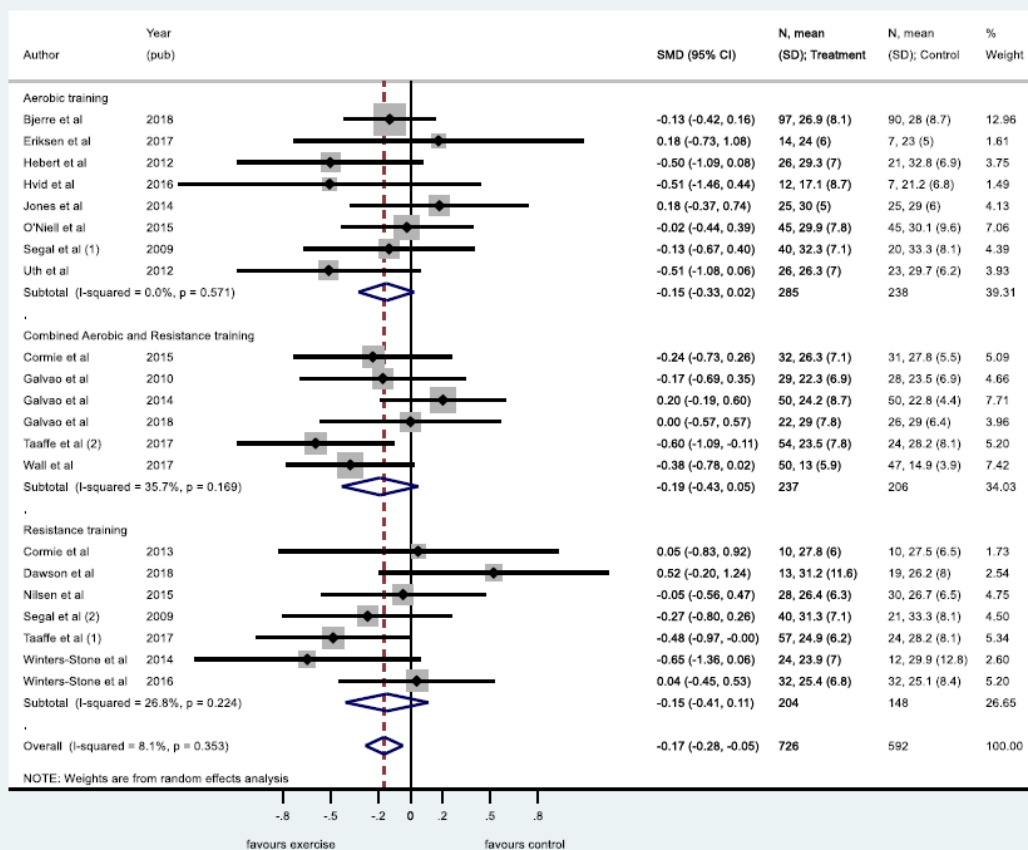

**Figure S17.** Pooled standard mean difference (SMD) on Whole body fat comparing exercise interventions with usual care or control in men with prostate cancer stratified after exercise modality. A random effects model of DerSimonian & Laird, with estimate of heterogeneity from the Mantel-Haenszel model was used.

## General physical health

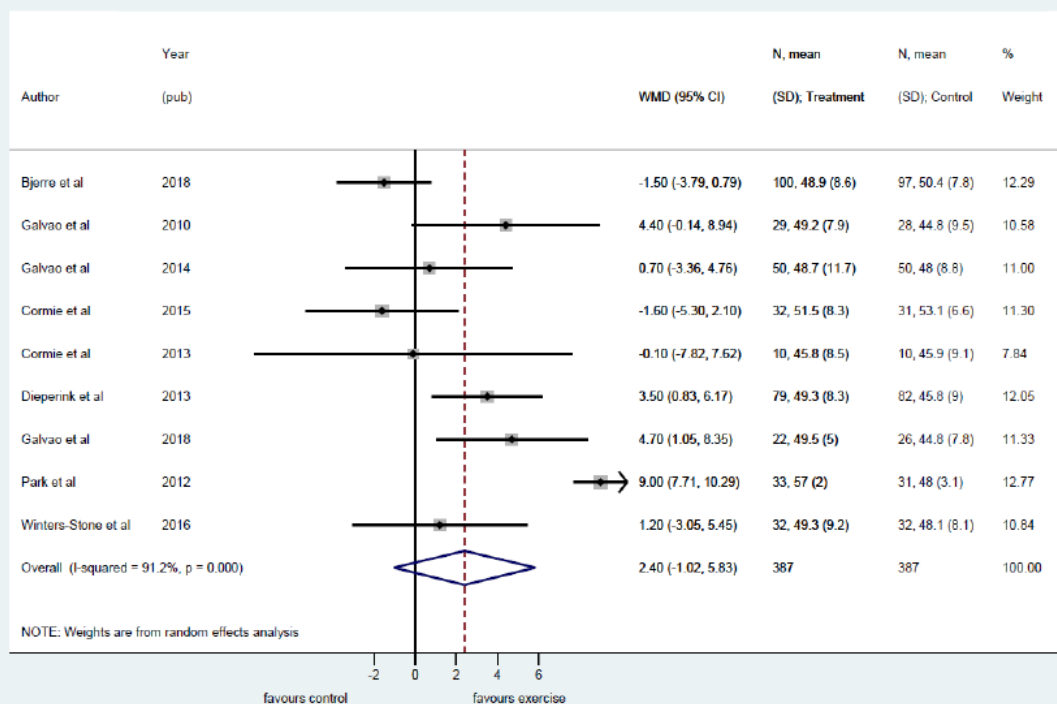

**Figure S18.** Pooled standard mean difference (SMD) on General physical health comparing exercise interventions with usual care or control in men with prostate cancer. A random effects model of DerSimonian & Laird, with estimate of heterogeneity from the Mantel-Haenszel model was used.

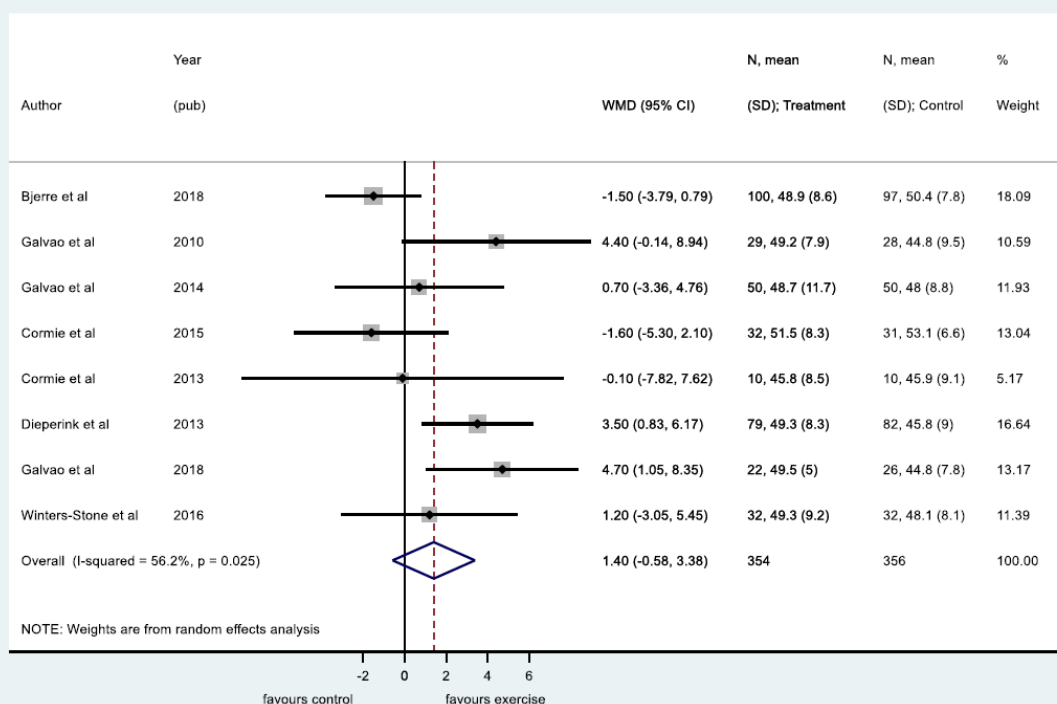

**Figure S19.** Pooled standard mean difference (SMD) on General physical health comparing exercise interventions with usual care or control in men with prostate cancer. A random effects model of DerSimonian & Laird, with estimate of heterogeneity from the Mantel-Haenszel model was used.

Laird, with estimate of heterogeneity from the Mantel-Haenszel model was used. NOTE: Park et al. 2012 was excluded from the meta-analysis.

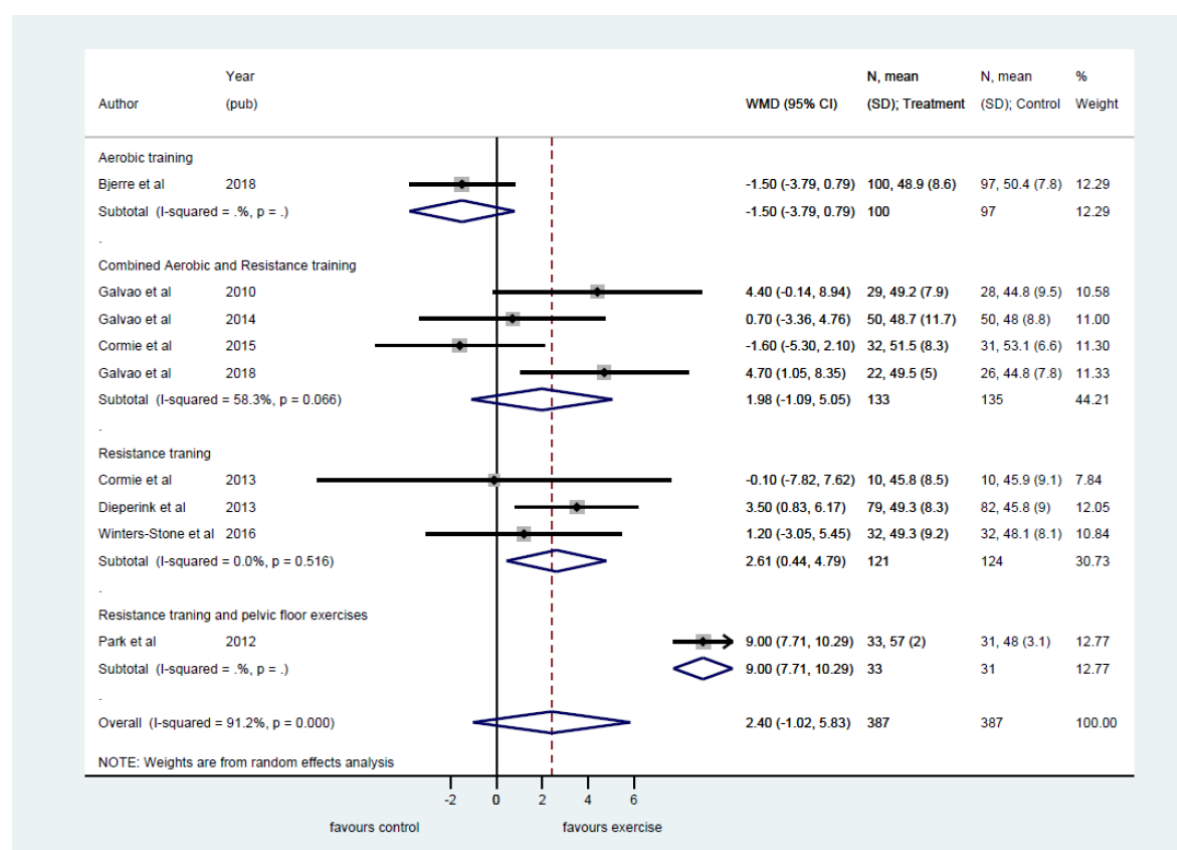

**Figure S20.** Pooled standard mean difference (SMD) on General physical health comparing exercise interventions with usual care or control in men with prostate cancer stratified after exercise modality. A random effects model of DerSimonian & Laird, with estimate of heterogeneity from the Mantel-Haenszel model was used.

## General mental health

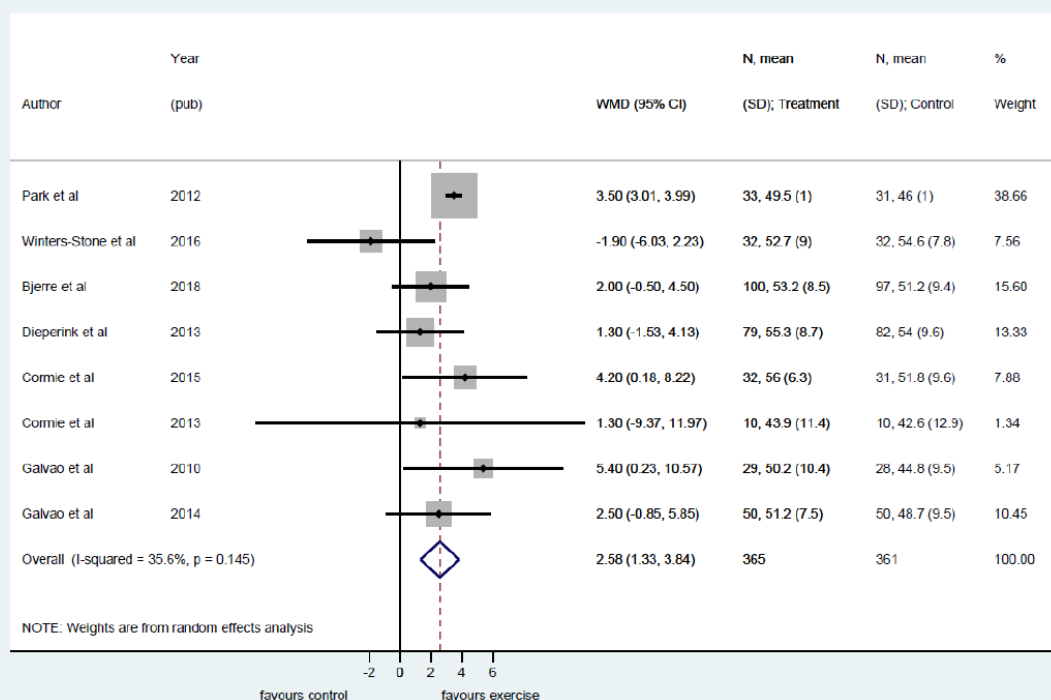

**Figure S21.** Pooled standard mean difference (SMD) on General mental health comparing exercise interventions with usual care or control in men with prostate cancer. A random effects model of DerSimonian & Laird, with estimate of heterogeneity from the Mantel-Haenszel model was used.

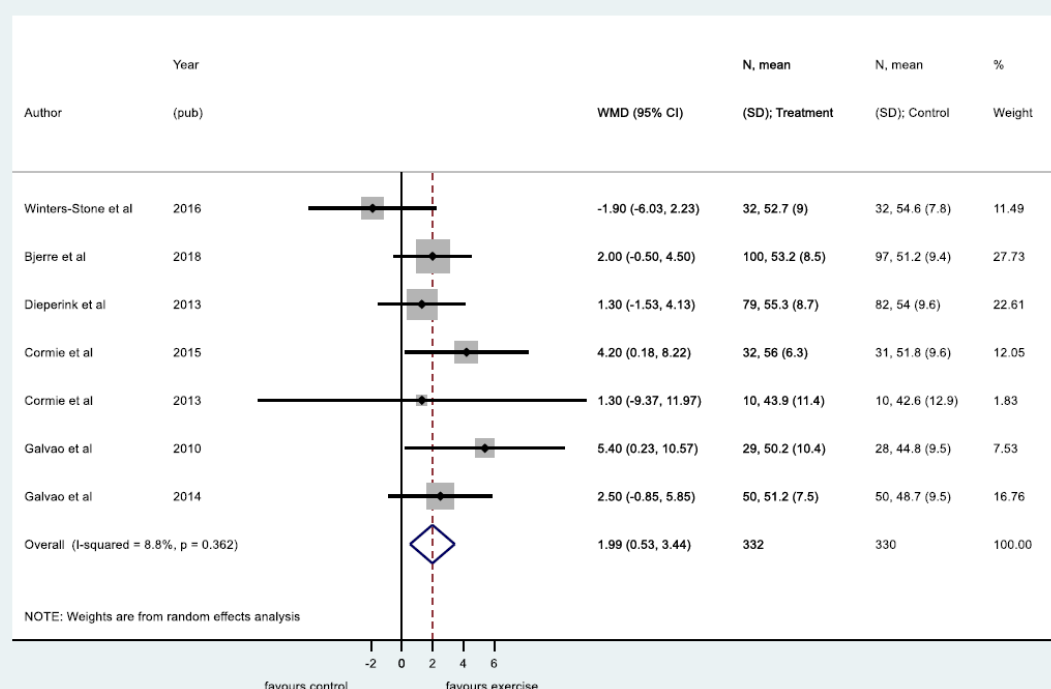

**Figure S22.** Pooled standard mean difference (SMD) on General mental health comparing exercise interventions with usual care or control in men with prostate cancer. A random effects model of DerSimonian & Laird, with

estimate of heterogeneity from the Mantel-Haenszel model was used. NOTE: Park et al. 2012 was excluded from the meta-analysis.

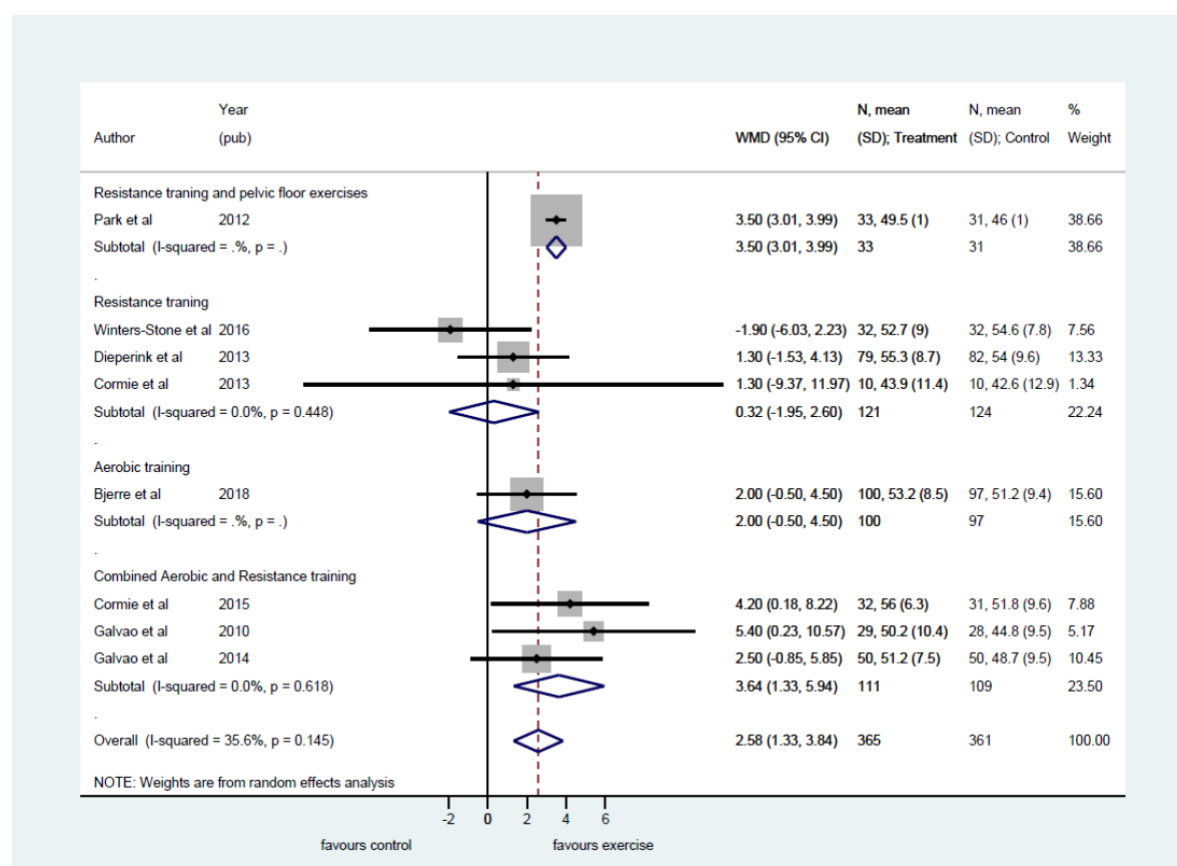

**Figure S23.** Pooled standard mean difference (SMD) on General mental health comparing exercise interventions with usual care or control in men with prostate cancer stratified after exercise modality. A random effects model of DerSimonian & Laird, with estimate of heterogeneity from the Mantel-Haenszel model was used.

## Systolic blood pressure

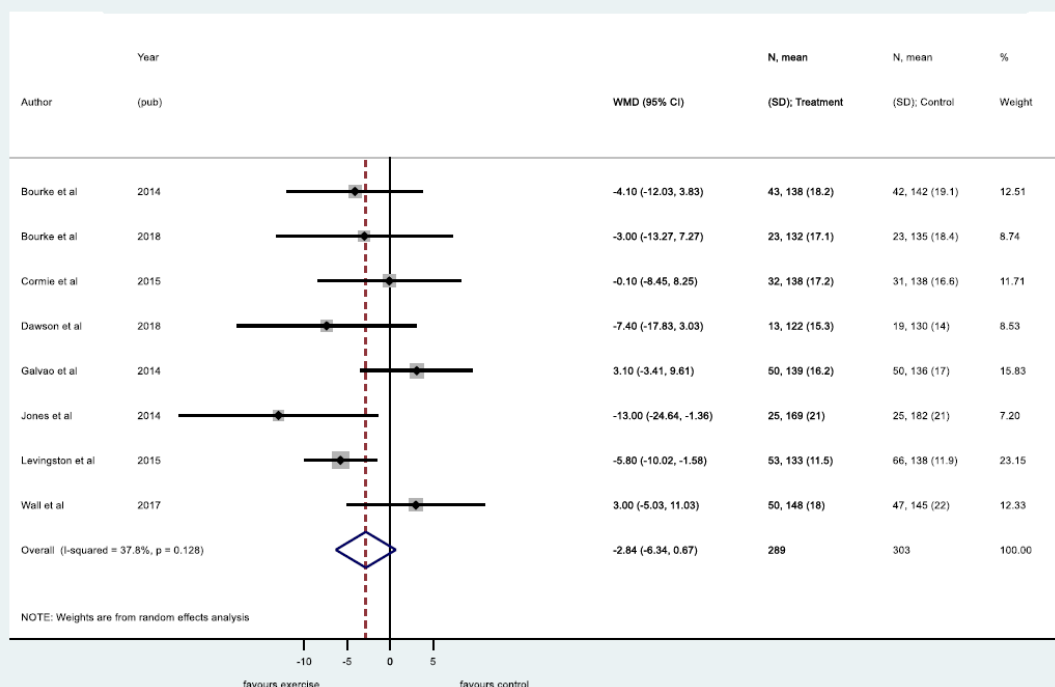

**Figure S24.** Pooled standard mean difference (SMD) on Systolic blood pressure comparing exercise interventions with usual care or control in men with prostate cancer. A random effects model of DerSimonian & Laird, with estimate of heterogeneity from the Mantel-Haenszel model was used.

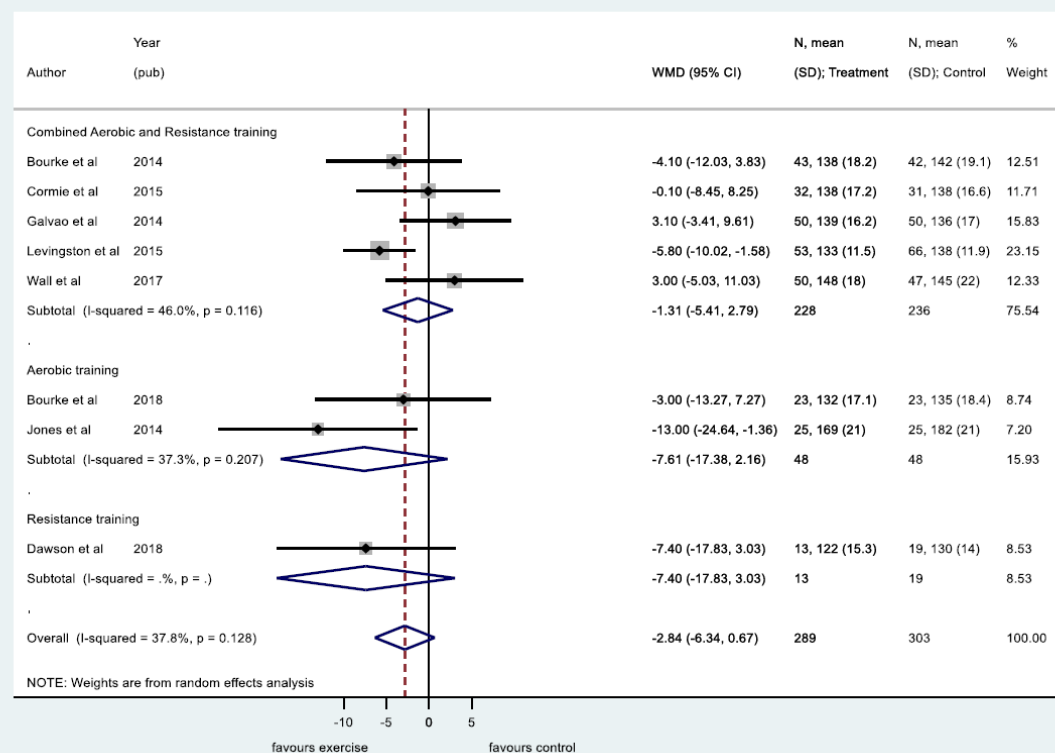

**Figure 25.** Pooled standard mean difference (SMD) on Systolic blood pressure comparing exercise interventions with usual care or control in men with prostate cancer stratified after exercise modality. A random effects model of DerSimonian & Laird, with estimate of heterogeneity from the Mantel-Haenszel model was used.

**Diastolic blood pressure**

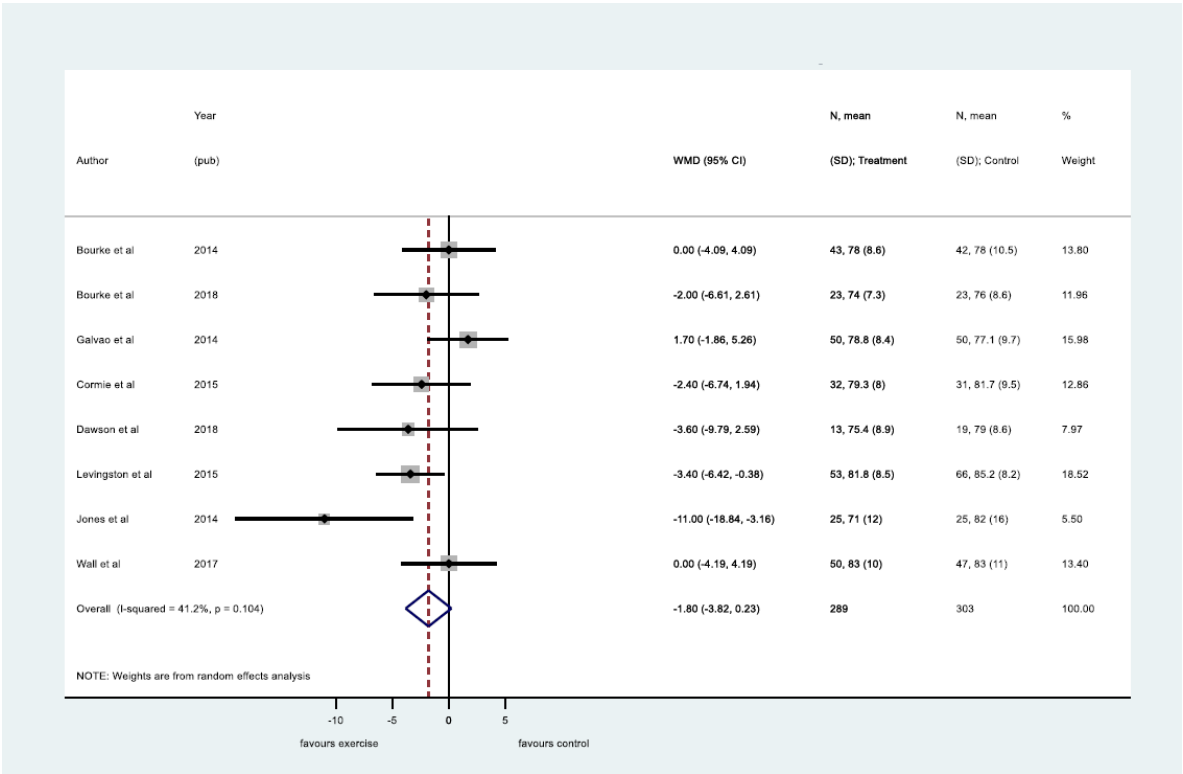

**Figure S26.** Pooled standard mean difference (SMD) on Diastolic blood pressure comparing exercise interventions with usual care or control in men with prostate cancer. A random effects model of DerSimonian & Laird, with estimate of heterogeneity from the Mantel-Haenszel model was used.

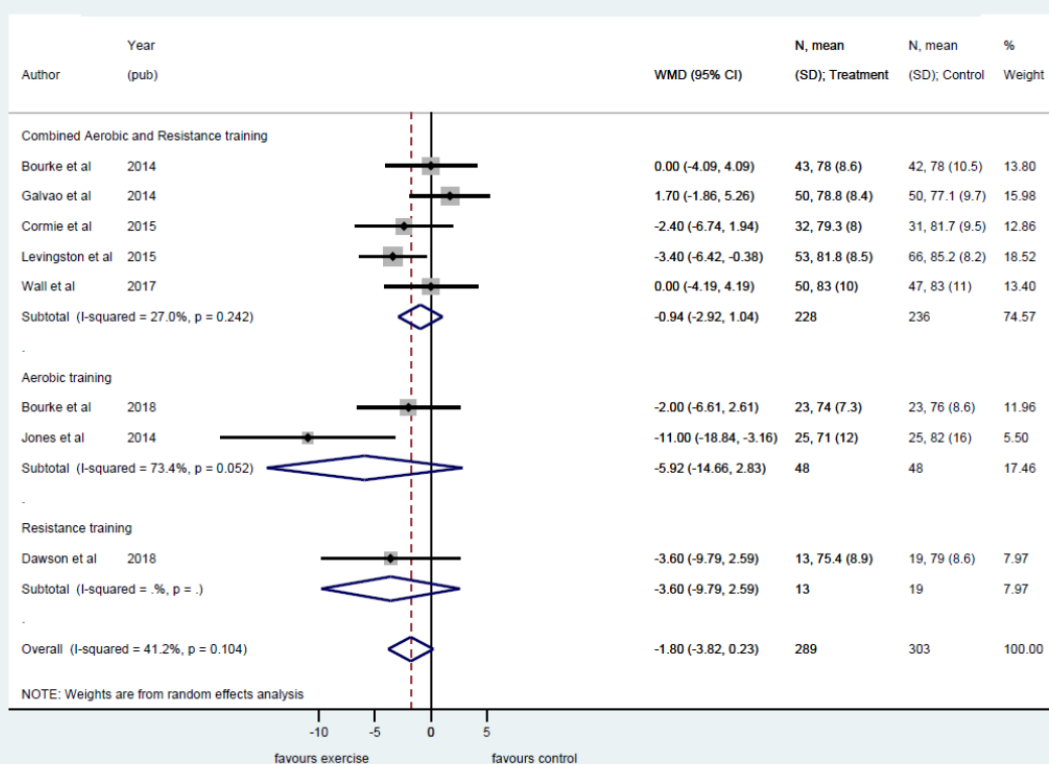

**Figure S27.** Pooled standard mean difference (SMD) on Diastolic blood pressure comparing exercise interventions with usual care or control in men with prostate cancer stratified after exercise modality. A random effects model of DerSimonian & Laird, with estimate of heterogeneity from the Mantel-Haenszel model was used.
